# Supplementary material for: Feature Extraction and Machine Learning for the Classification of Brazilian Savannah Pollen Grains
Source: PubMed Central journal article supplement (PMC4898734; doi:10.1371/journal.pone.0157044), 2016-06-08

## MATERIAL DE APOIO

1. ARRANHA-GATO

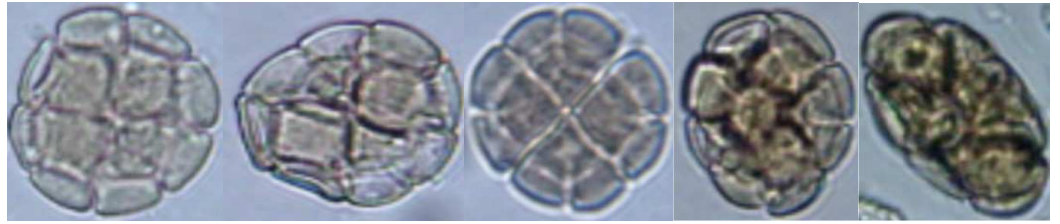

2. ANGICO

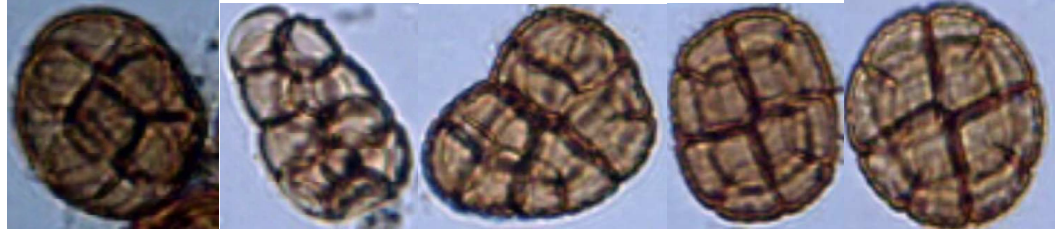

3. PALMEIRA

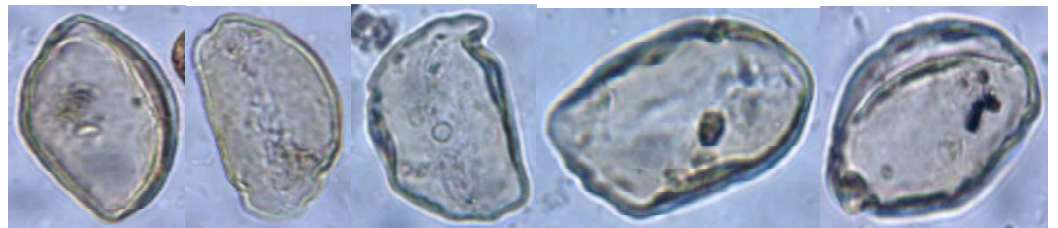

4. GUARIROBA

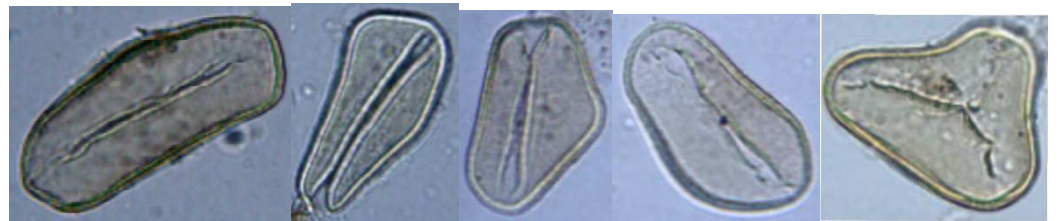

5. CIPÓ-NEVE

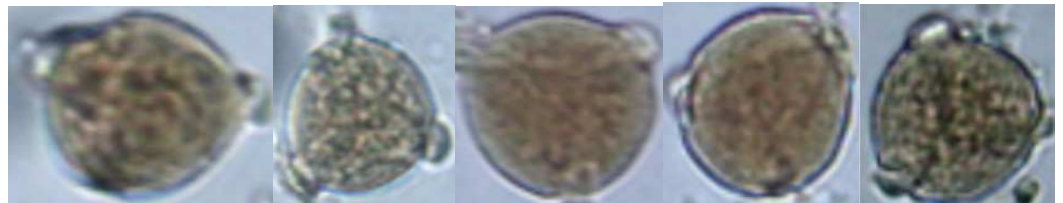

6. CARVÃO-VERMELHO

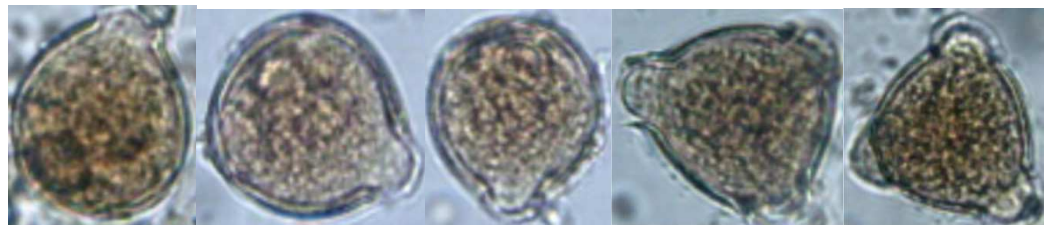

7. PAU-TERRA

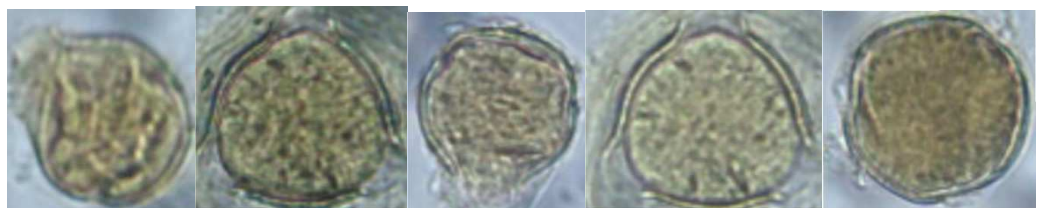

8. IMBAÚBA

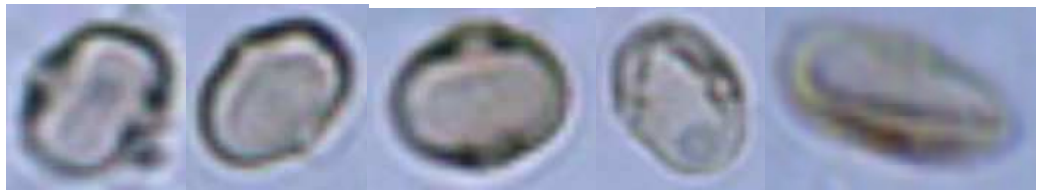

9. DORME-DORME

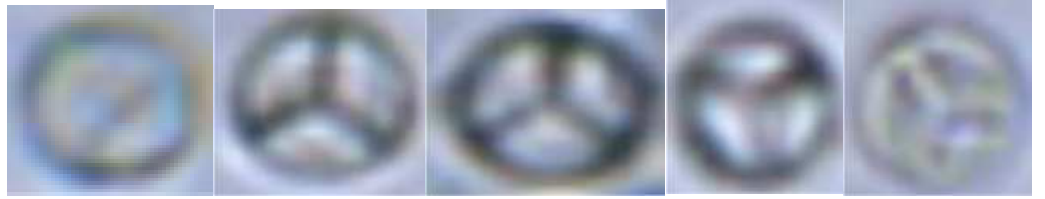

10. CAFÉ-DO-MATO

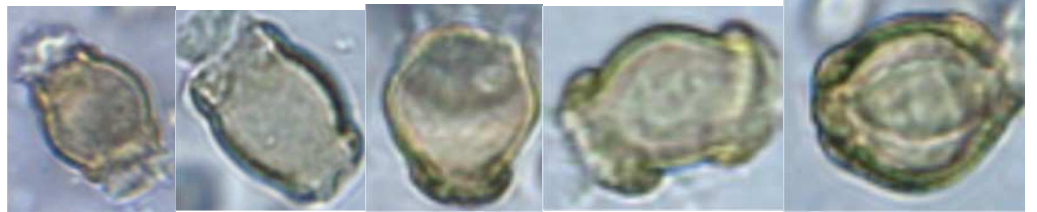

11. MATA-PASTO

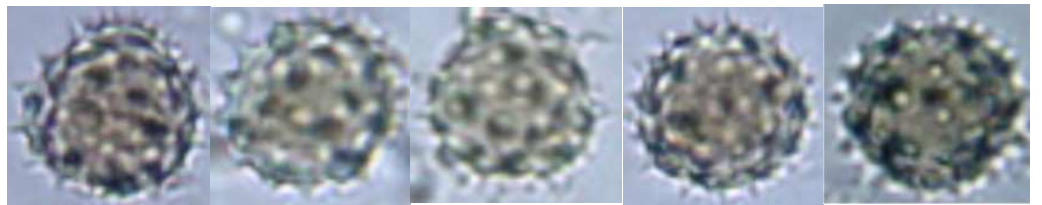

12. MARGARIDA-DO-CAMPO

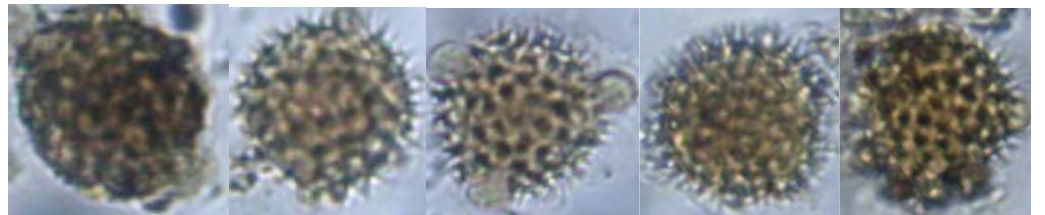

13. CANELA-DE-EMA

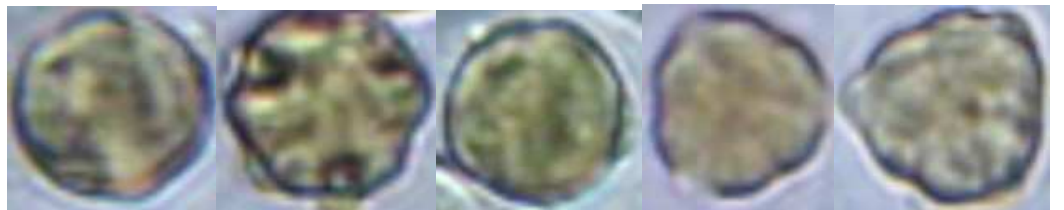

14. AROEIRA

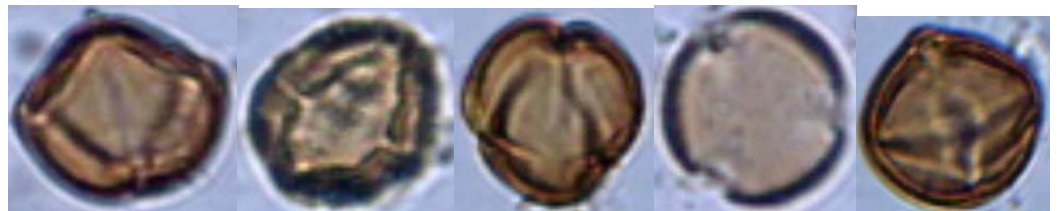

15. SANGRA D' ÁGUA

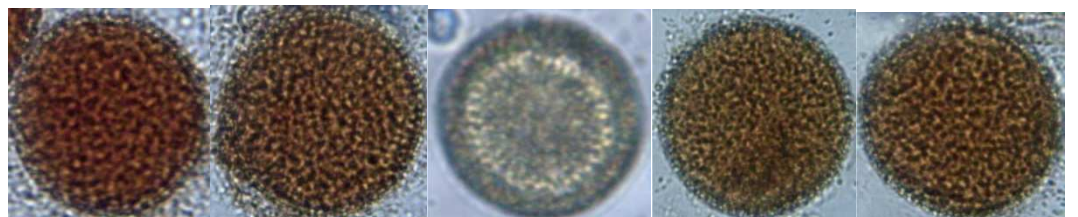

16. BRACHIARIA

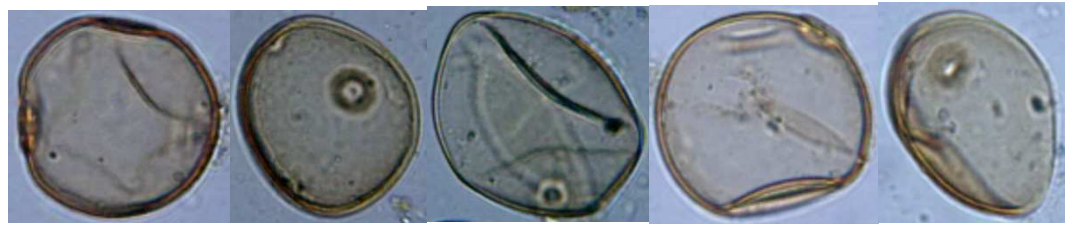

17. ALFAZEMA-BRAVA

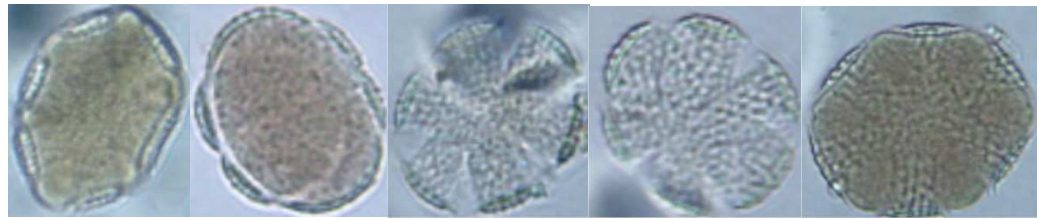

18. MAMOEIRO-SELVAGEM

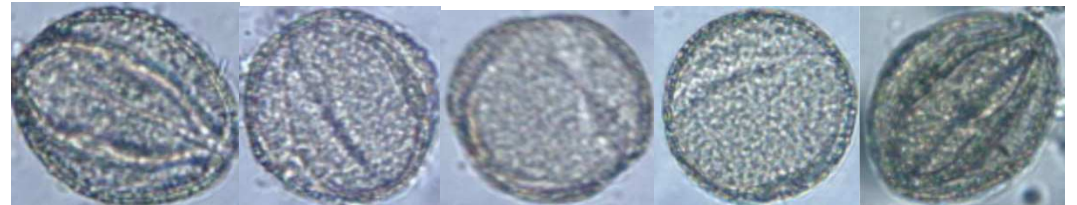

19. EUCALIPTO

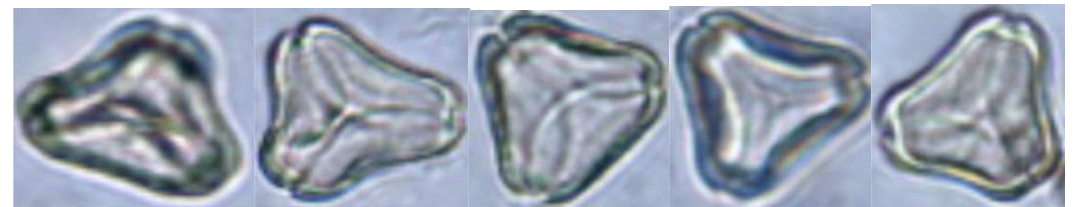

20. CAMBOATA

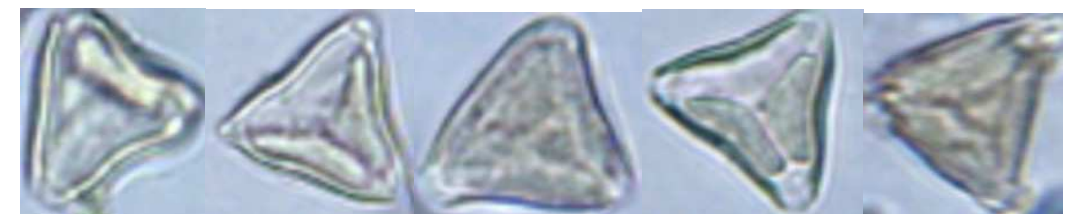

21. MYRCIA

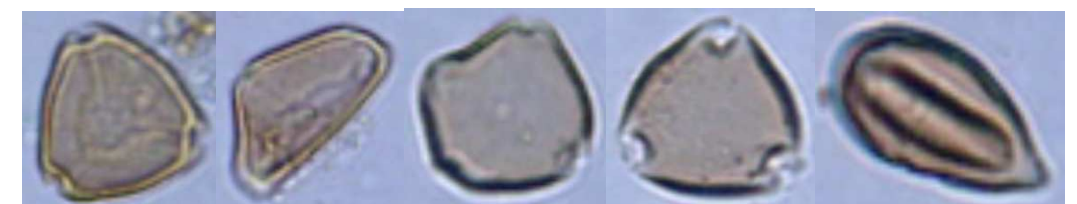

22. CIPÓ-UVA

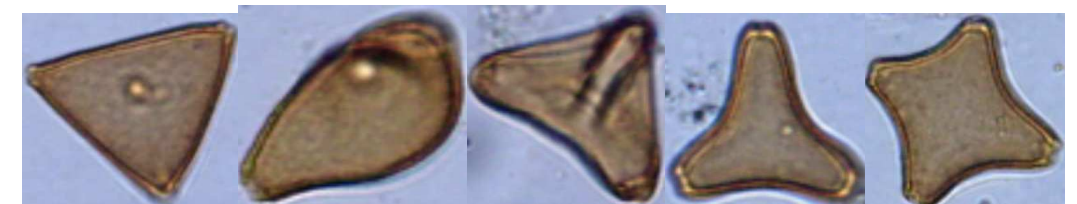

23. ALMECEGA

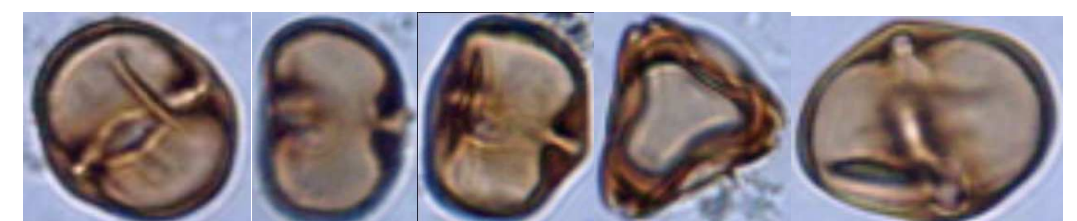

Supplement: pone.0157044.s004.pdf [file pone.0157044.s004.pdf]
