# Supplementary material for: Feature Extraction and Machine Learning for the Classification of Brazilian Savannah Pollen Grains
Source: PubMed Central journal article supplement (PMC4898734; doi:10.1371/journal.pone.0157044), 2016-06-08
Supplement: pone.0157044.s001.pdf [file pone.0157044.s001.pdf]

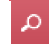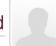

## POLEN23E

[Edit article](#)

|                                      |                                                    |
|--------------------------------------|----------------------------------------------------|
| <a href="#">anadenanthera_17.jpg</a> | <a href="#">preview</a>   <a href="#">download</a> |
| <a href="#">arecaceae_02.jpg</a>     | <a href="#">preview</a>   <a href="#">download</a> |
| <a href="#">arrabidaea_03.jpg</a>    | <a href="#">preview</a>   <a href="#">download</a> |
| <a href="#">cecropia_02.jpg</a>      | <a href="#">preview</a>   <a href="#">download</a> |
| <a href="#">chromolaena_01.jpg</a>   | <a href="#">preview</a>   <a href="#">download</a> |
| <a href="#">combretum_03.jpg</a>     | <a href="#">preview</a>   <a href="#">download</a> |
| <a href="#">croton_02.jpg</a>        | <a href="#">preview</a>   <a href="#">download</a> |

[Download all](#)

Share this:

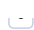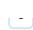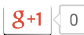

0

[Embed\\*](#)

Cite this: Barbosa Gonçalves, Ariadne (2015): POLEN23E. [figshare](#).  
<http://dx.doi.org/10.6084/m9.figshare.1525086>  
 Retrieved 16:09, Sep 01, 2015 (GMT)

\*The embed functionality can only be used for non commercial purposes... [more](#)

### Description

Image dataset for training and testing computer vision software for pollen identification.

Anadenanthera colubrina - <http://dx.doi.org/10.6084/m9.figshare.1524247>

Arecaceae - <http://dx.doi.org/10.6084/m9.figshare.1524283>

Arrabidaea florida - <http://dx.doi.org/10.6084/m9.figshare.1524320>

Cecropia pachystachya - <http://dx.doi.org/10.6084/m9.figshare.1524356>

Chromolaena laevigata - <http://dx.doi.org/10.6084/m9.figshare.1524392>

Combretum discolor - <http://dx.doi.org/10.6084/m9.figshare.1524428>

Croton urucurana - <http://dx.doi.org/10.6084/m9.figshare.1524464>

Dipteryx alata - <http://dx.doi.org/10.6084/m9.figshare.1524501>

Eucalyptus - <http://dx.doi.org/10.6084/m9.figshare.1524537>

Faramaea - <http://dx.doi.org/10.6084/m9.figshare.1524573>

Hyptis - <http://dx.doi.org/10.6084/m9.figshare.1524609>

Mabea fistulifera - <http://dx.doi.org/10.6084/m9.figshare.1524645>

Matayba guianensis - <http://dx.doi.org/10.6084/m9.figshare.1524681>

Mimosa somnians - <http://dx.doi.org/10.6084/m9.figshare.1524753>

20  
views

0  
shares

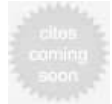

Published on 28 Aug 2015 - 02:12 (GMT)

Filesize in total is 32.85 MB

### Categories

[Palynology](#)  
[Botany](#)  
[Computer Software](#)  
[Applied Computer Science](#)

### Authors

Ariadne Barbosa Gonçalves

### Tags

[savannah](#) [pollen](#)  
[pollengrain](#) [palynology](#)  
[Extreme Learning Machine](#)  
[computer vision](#)

### License (what's this?)

CC-BY

### Export

[Export to RefWorks](#)  
[Export to BibTeX](#)  
[Export to Ref. manager](#)  
[Export to Mendeley](#)  
[Export to Endnote](#)  
[Export to DataCite](#)  
[Export to NLM](#)  
[Export to DC](#)

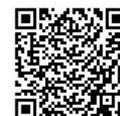

Myrcia - <http://dx.doi.org/10.6084/m9.figshare.1524789>

Protium heptaphyllum - <http://dx.doi.org/10.6084/m9.figshare.1524826>

Qualea multiflora - <http://dx.doi.org/10.6084/m9.figshare.1524862>

Schinus terebinthifolius - <http://dx.doi.org/10.6084/m9.figshare.1524898>

Senegalia plumosa - <http://dx.doi.org/10.6084/m9.figshare.1524935>

Serjania larotteana - <http://dx.doi.org/10.6084/m9.figshare.1524972>

Syagrus - <http://dx.doi.org/10.6084/m9.figshare.1525008>

Tridax procumbens - <http://dx.doi.org/10.6084/m9.figshare.1525046>

Urochloa decumbens - <http://dx.doi.org/10.6084/m9.figshare.1525085>

## Comments (0)

### Post a new comment

Post comment
