# Supplementary material for: Feature Extraction and Machine Learning for the Classification of Brazilian Savannah Pollen Grains
Source: PubMed Central journal article supplement (PMC4898734; doi:10.1371/journal.pone.0157044), 2016-06-08
Supplement: pone.0157044.s003.pdf [file pone.0157044.s003.pdf]

---

# Pólen

---

Temos a seguir 46 imagens de grãos de pólen. Para cada imagem, escolha (clcando) a opção que melhor representa a espécie do grão de pólen. Ao final da página, clique no botão enviar para fechar o formulário e enviar as suas respostas.

---

**1**

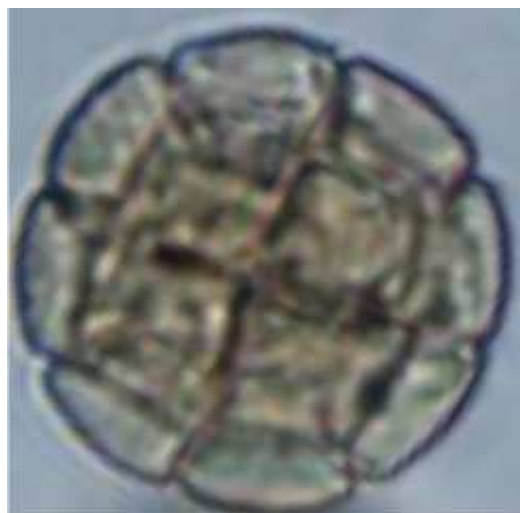

**1**

A que classe este pólen pertence?

- Alfazema-brava
- Almecega
- Angico
- Aroeira
- Arranha-gato
- Brachiaria
- Café-do-mato
- Camboatá
- Canela-de-ema
- Carvão-vermelho
- Cipó-neve
- Cipó-uva
- Dorme-dorme
- Eucalipto
- Guariroba
- Imbaúba
- Mamoeiro-selvagem

- Margarida-do-campo
  - Mata-pasto
  - Myrcia
  - Palmeira
  - Pau-terra
  - Sangra d' água
- 

2

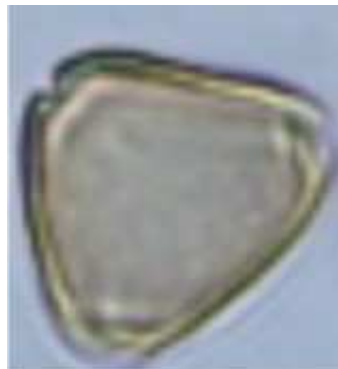

2

A que classe este pólen pertence?

- Alfazema-brava
- Almecega
- Angico
- Aroeira
- Arranha-gato
- Brachiaria
- Café-do-mato
- Camboatá
- Canela-de-ema
- Carvão-vermelho
- Cipó-neve
- Cipó-uva
- Dorme-dorme
- Eucalipto
- Guariroba
- Imbaúba
- Mamoeiro-selvagem
- Margarida-do-campo
- Mata-pasto
- Myrcia
- Palmeira
- Pau-terra
- Sangra d' água

---

**3**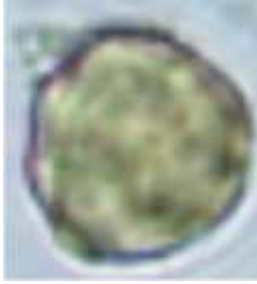

---

**3**

A que classe este pólen pertence?

- Alfazema-brava
  - Almecega
  - Angico
  - Aroeira
  - Arranha-gato
  - Brachiaria
  - Café-do-mato
  - Camboatá
  - Canela-de-ema
  - Carvão-vermelho
  - Cipó-neve
  - Cipó-uva
  - Dorme-dorme
  - Eucalipto
  - Guariroba
  - Imbaúba
  - Mamoeiro-selvagem
  - Margarida-do-campo
  - Mata-pasto
  - Myrcia
  - Palmeira
  - Pau-terra
  - Sangra d' água
- 

**4**

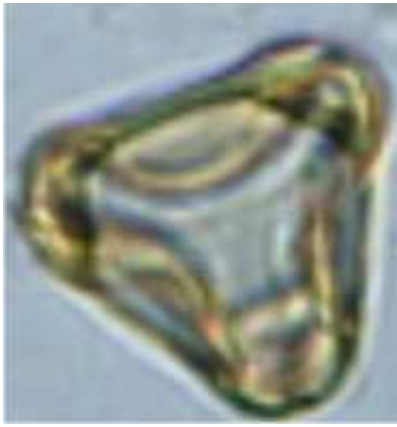

---

**4**

A que classe este pólen pertence?

- Alfazema-brava
  - Almecega
  - Angico
  - Aroeira
  - Arranha-gato
  - Brachiaria
  - Café-do-mato
  - Camboatá
  - Canela-de-ema
  - Carvão-vermelho
  - Cipó-neve
  - Cipó-uva
  - Dorme-dorme
  - Eucalipto
  - Guariroba
  - Imbaúba
  - Mamoeiro-selvagem
  - Margarida-do-campo
  - Mata-pasto
  - Myrcia
  - Palmeira
  - Pau-terra
  - Sangra d' água
- 

**5**

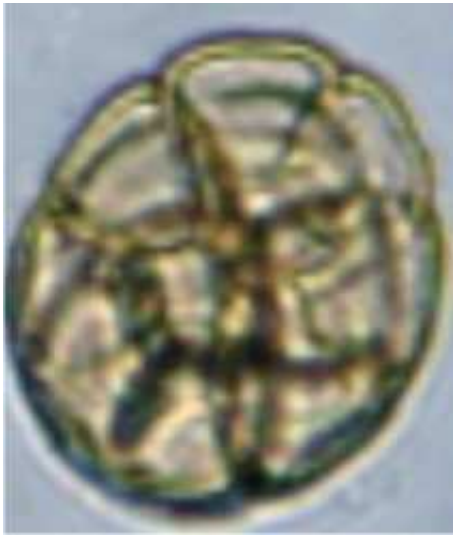

---

5

A que classe este pólen pertence?

- Alfazema-brava
- Almecega
- Angico
- Aroeira
- Arranha-gato
- Brachiaria
- Café-do-mato
- Camboatá
- Canela-de-ema
- Carvão-vermelho
- Cipó-neve
- Cipó-uva
- Dorme-dorme
- Eucalipto
- Guariroba
- Imbaúba
- Mamoeiro-selvagem
- Margarida-do-campo
- Mata-pasto
- Myrcia
- Palmeira
- Pau-terra
- Sangra d' água

---

6

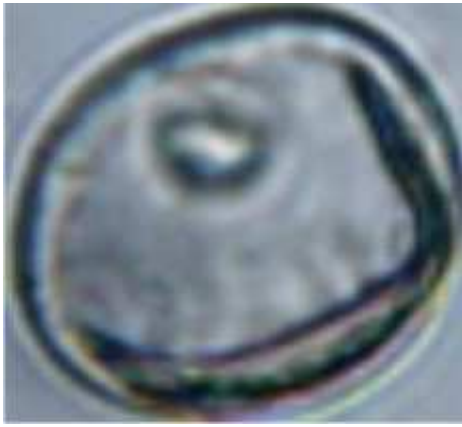

---

**6**

A que classe este pólen pertence?

- Alfazema-brava
- Almecega
- Angico
- Aroeira
- Arranha-gato
- Brachiaria
- Café-do-mato
- Camboatá
- Canela-de-ema
- Carvão-vermelho
- Cipó-neve
- Cipó-uva
- Dorme-dorme
- Eucalipto
- Guariroba
- Imbaúba
- Mamoeiro-selvagem
- Margarida-do-campo
- Mata-pasto
- Myrcia
- Palmeira
- Pau-terra
- Sangra d' água

---

**7**

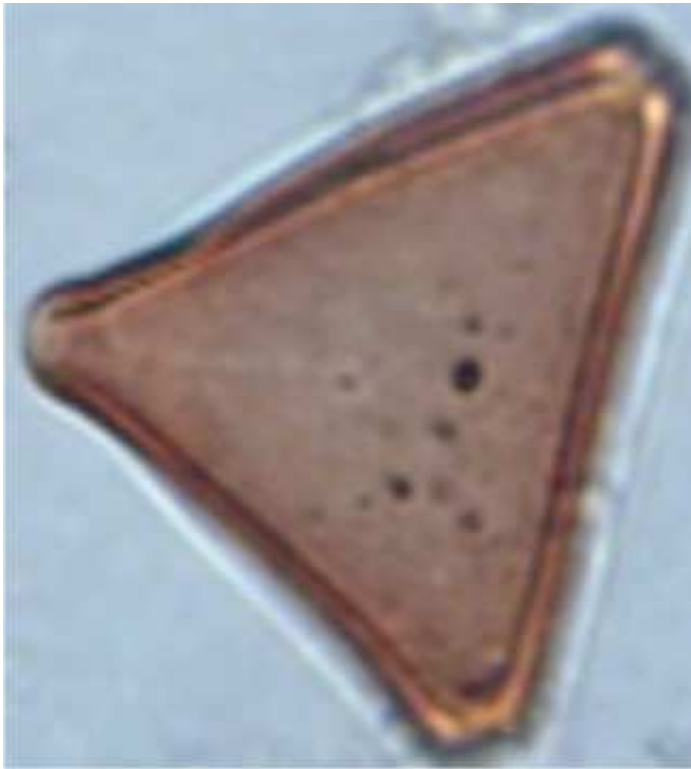

---

7

A que classe este pólen pertence?

- Alfazema-brava
- Almecega
- Angico
- Aroeira
- Arranha-gato
- Brachiaria
- Café-do-mato
- Camboatá
- Canela-de-ema
- Carvão-vermelho
- Cipó-neve
- Cipó-uva
- Dorme-dorme
- Eucalipto
- Guariroba
- Imbaúba
- Mamoeiro-selvagem
- Margarida-do-campo
- Mata-pasto
- Myrcia
- Palmeira
- Pau-terra
- Sangra d' água

8

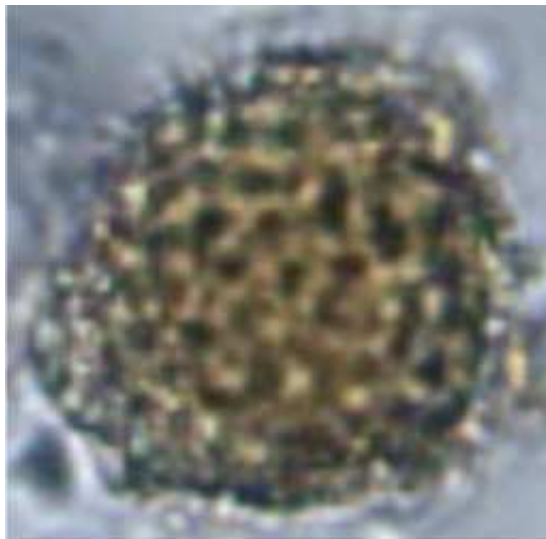

8

A que classe este pólen pertence?

- Alfazema-brava
- Almecega
- Angico
- Aroeira
- Arranha-gato
- Brachiaria
- Café-do-mato
- Camboatá
- Canela-de-ema
- Carvão-vermelho
- Cipó-neve
- Cipó-uva
- Dorme-dorme
- Eucalipto
- Guariroba
- Imbaúba
- Mamoeiro-selvagem
- Margarida-do-campo
- Mata-pasto
- Myrcia
- Palmeira
- Pau-terra
- Sangra d' água

9



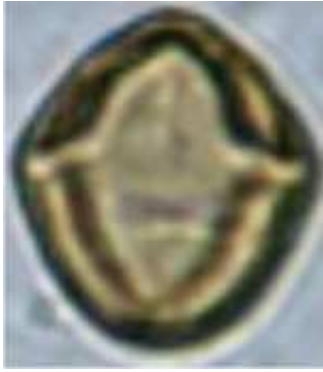

---

**9**

A que classe este pólen pertence?

- Alfazema-brava
- Almecega
- Angico
- Aroeira
- Arranha-gato
- Brachiaria
- Café-do-mato
- Camboatá
- Canela-de-ema
- Carvão-vermelho
- Cipó-neve
- Cipó-uva
- Dorme-dorme
- Eucalipto
- Guariroba
- Imbaúba
- Mamoeiro-selvagem
- Margarida-do-campo
- Mata-pasto
- Myrcia
- Palmeira
- Pau-terra
- Sangra d' água

---

**10**

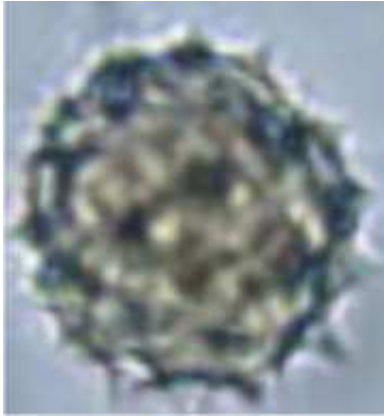

---

**10**

A que classe este pólen pertence?

- Alfazema-brava
- Almecega
- Angico
- Aroeira
- Arranha-gato
- Brachiaria
- Café-do-mato
- Camboatá
- Canela-de-ema
- Carvão-vermelho
- Cipó-neve
- Cipó-uva
- Dorme-dorme
- Eucalipto
- Guariroba
- Imbaúba
- Mamoeiro-selvagem
- Margarida-do-campo
- Mata-pasto
- Myrcia
- Palmeira
- Pau-terra
- Sangra d' água

---

**11**

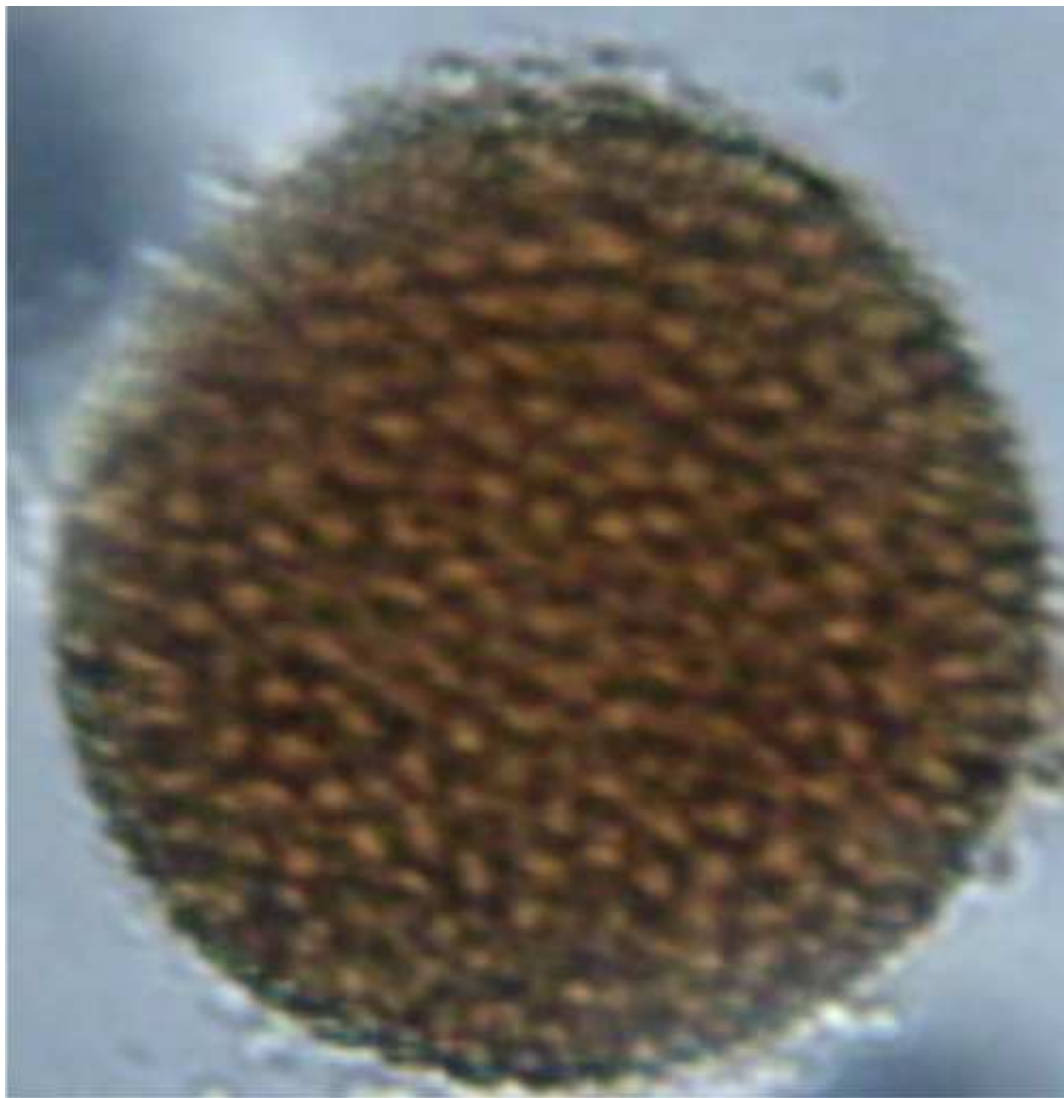

---

**11**

A que classe este pólen pertence?

- Alfazema-brava
- Almecega
- Angico
- Aroeira
- Arranha-gato
- Brachiaria
- Café-do-mato
- Camboatá
- Canela-de-ema
- Carvão-vermelho
- Cipó-neve
- Cipó-uva
- Dorme-dorme
- Eucalipto
- Guariroba
- Imbaúba
- Mamoeiro-selvagem

- Margarida-do-campo
  - Mata-pasto
  - Myrcia
  - Palmeira
  - Pau-terra
  - Sangra d' água
- 

**12**

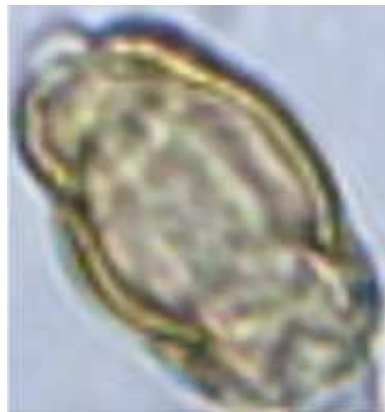

**12**

A que classe este pólen pertence?

- Alfazema-brava
- Almecega
- Angico
- Aroeira
- Arranha-gato
- Brachiaria
- Café-do-mato
- Camboatá
- Canela-de-ema
- Carvão-vermelho
- Cipó-neve
- Cipó-uva
- Dorme-dorme
- Eucalipto
- Guariroba
- Imbaúba
- Mamoeiro-selvagem
- Margarida-do-campo
- Mata-pasto
- Myrcia
- Pau-terra
- Palmeira

- Sangra d' água
- 

**13**

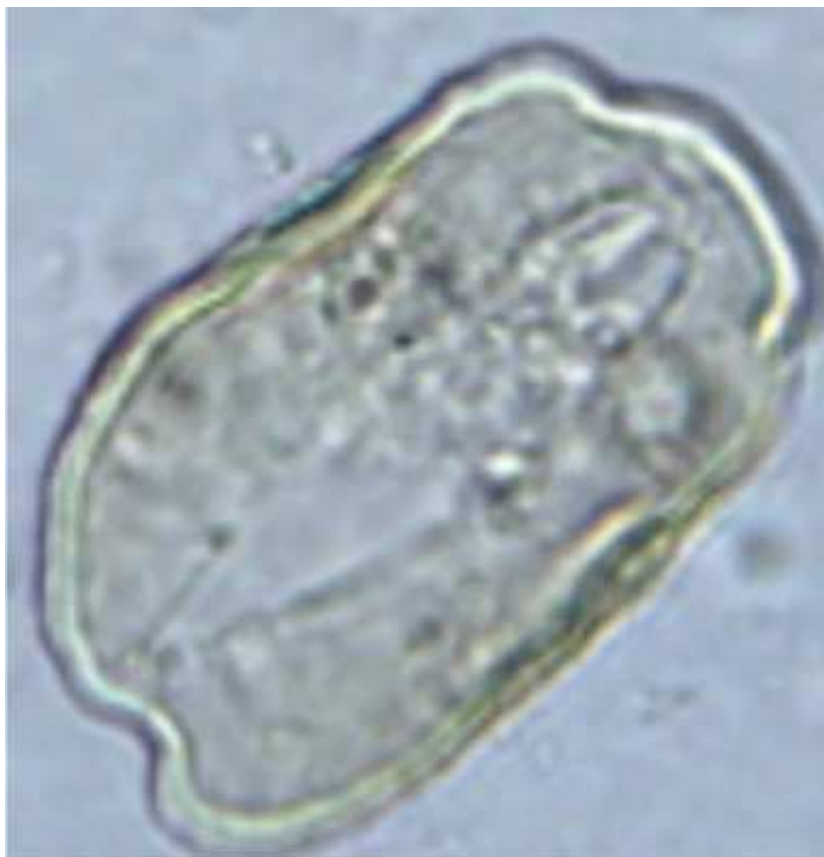

**13**

A que classe este pólen pertence?

- Alfazema-brava
- Almecega
- Angico
- Aroeira
- Arranha-gato
- Brachiaria
- Café-do-mato
- Camboatá
- Canela-de-ema
- Carvão-vermelho
- Cipó-neve
- Cipó-uva
- Dorme-dorme
- Eucalipto
- Guariroba
- Imbaúba
- Mamoeiro-selvagem
- Margarida-do-campo

- Mata-pasto
  - Myrcia
  - Palmeira
  - Pau-terra
  - Sangra d' água
- 

14

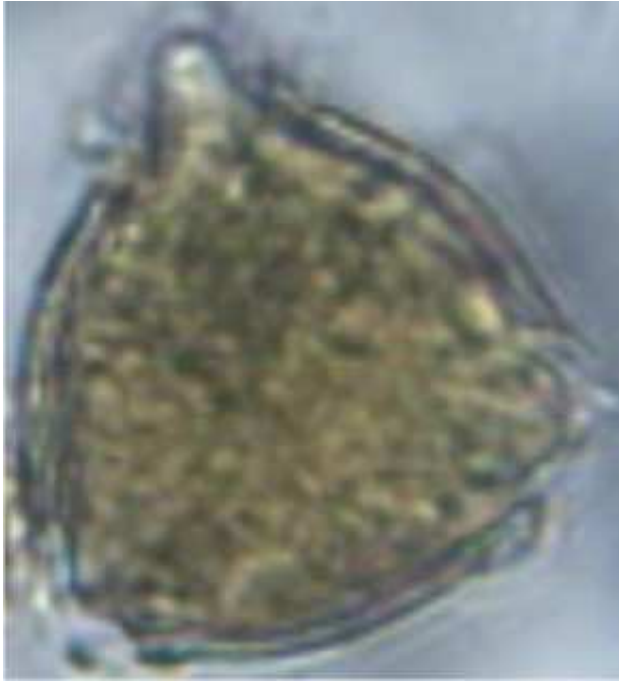

14

A que classe este pólen pertence?

- Alfazema-brava
- Almecega
- Angico
- Aroeira
- Arranha-gato
- Brachiaria
- Café-do-mato
- Camboatá
- Canela-de-ema
- Carvão-vermelho
- Cipó-neve
- Cipó-uva
- Dorme-dorme
- Eucalipto
- Guariroba
- Imbaúba
- Mamoeiro-selvagem
- Margarida-do-campo

- Mata-pasto
  - Myrcia
  - Palmeira
  - Pau-terra
  - Sangra d' água
- 

15

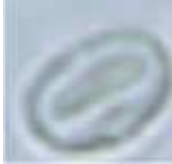

15

A que classe este pólen pertence?

- Alfazema-brava
  - Almecega
  - Angico
  - Aroeira
  - Arranha-gato
  - Brachiaria
  - Café-do-mato
  - Camboatá
  - Canela-de-ema
  - Carvão-vermelho
  - Cipó-neve
  - Cipó-uva
  - Dorme-dorme
  - Eucalipto
  - Guariroba
  - Imbaúba
  - Mamoeiro-selvagem
  - Margarida-do-campo
  - Mata-pasto
  - Myrcia
  - Palmeira
  - Pau-terra
  - Sangra d' água
- 

16

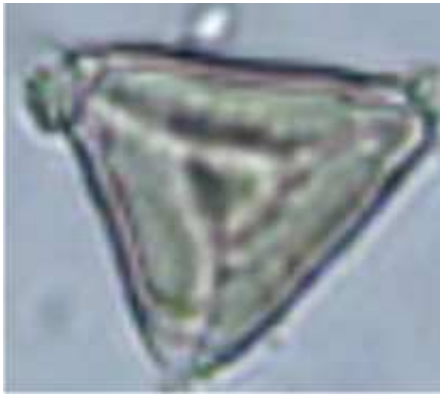

---

## 16

A que classe este pólen pertence?

- Alfazema-brava
- Almecega
- Angico
- Aroeira
- Arranha-gato
- Brachiaria
- Café-do-mato
- Camboatá
- Canela-de-ema
- Carvão-vermelho
- Cipó-neve
- Cipó-uva
- Dorme-dorme
- Eucalipto
- Guariroba
- Imbaúba
- Mamoeiro-selvagem
- Margarida-do-campo
- Mata-pasto
- Myrcia
- Palmeira
- Pau-terra
- Sangra d' água

---

## 17



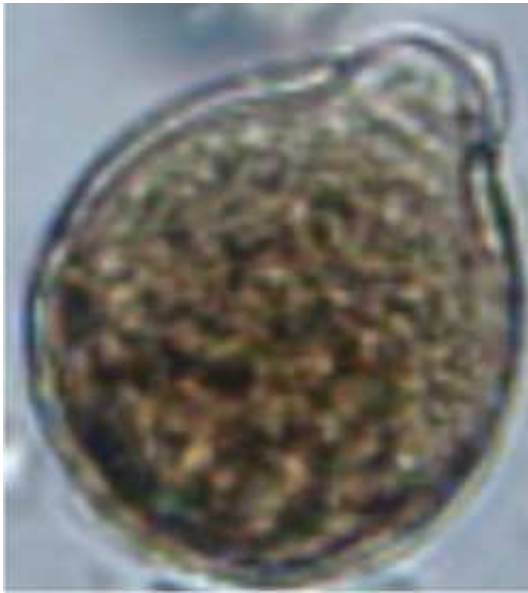

---

**17**

A que classe este pólen pertence?

- Alfazema-brava
- Almecega
- Angico
- Aroeira
- Arranha-gato
- Brachiaria
- Café-do-mato
- Camboatá
- Canela-de-ema
- Carvão-vermelho
- Cipó-neve
- Cipó-uva
- Dorme-dorme
- Eucalipto
- Guariroba
- Imbaúba
- Mamoeiro-selvagem
- Margarida-do-campo
- Mata-pasto
- Myrcia
- Palmeira
- Pau-terra
- Sangra d' água

---

**18**

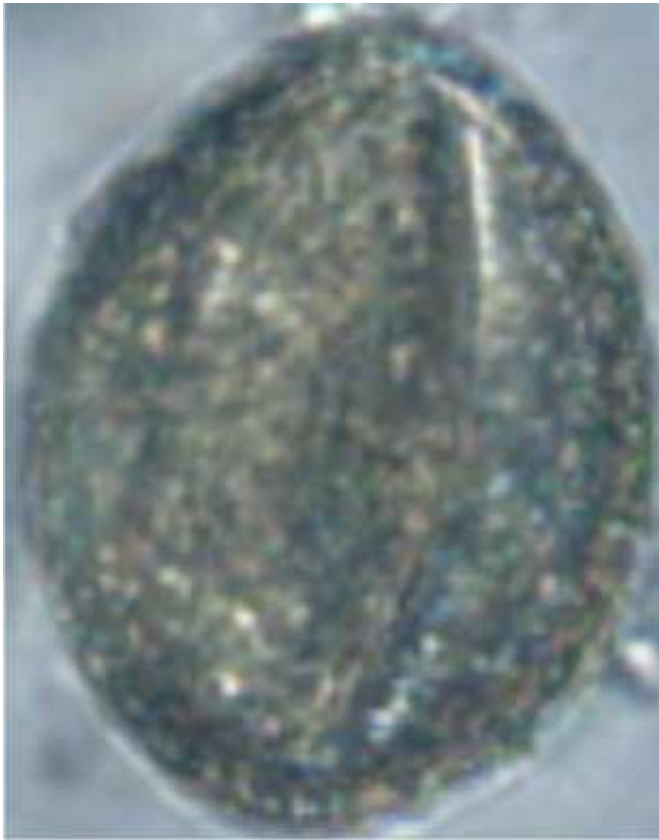

---

## 18

A que classe este pólen pertence?

- Alfazema-brava
- Almecega
- Angico
- Aroeira
- Arranha-gato
- Brachiaria
- Café-do-mato
- Camboatá
- Canela-de-ema
- Carvão-vermelho
- Cipó-neve
- Cipó-uva
- Dorme-dorme
- Eucalipto
- Guariroba
- Imbaúba
- Mamoeiro-selvagem
- Margarida-do-campo
- Mata-pasto
- Myrcia
- Palmeira
- Pau-terra

- Sangra d' água
- 

**19**

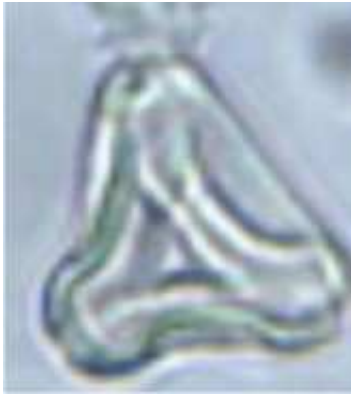

**19**

A que classe este pólen pertence?

- Alfazema-brava
- Almecega
- Angico
- Aroeira
- Arranha-gato
- Brachiaria
- Café-do-mato
- Camboatá
- Canela-de-ema
- Carvão-vermelho
- Cipó-neve
- Cipó-uva
- Dorme-dorme
- Eucalipto
- Guariroba
- Imbaúba
- Mamoeiro-selvagem
- Margarida-do-campo
- Mata-pasto
- Myrcia
- Palmeira
- Pau-terra
- Sangra d' água
- 

**20**

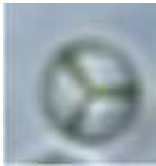

---

**20**

A que classe este pólen pertence?

- Alfazema-brava
- Almecega
- Angico
- Aroeira
- Arranha-gato
- Brachiaria
- Café-do-mato
- Camboatá
- Canela-de-ema
- Carvão-vermelho
- Cipó-neve
- Cipó-uva
- Dorme-dorme
- Eucalipto
- Guariroba
- Imbaúba
- Mamoeiro-selvagem
- Margarida-do-campo
- Mata-pasto
- Myrcia
- Palmeira
- Pau-terra
- Sangra d' água

---

**21**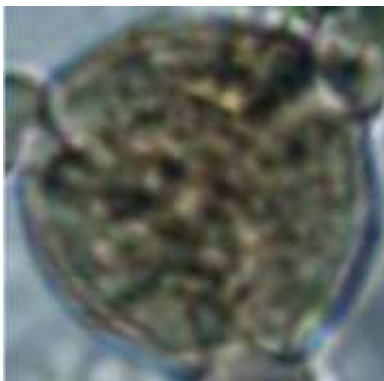

---

**21**

A que classe este pólen pertence?

- Alfazema-brava
- Almecega
- Angico
- Aroeira
- Arranha-gato
- Brachiaria
- Café-do-mato
- Camboatá
- Canela-de-ema
- Carvão-vermelho
- Cipó-neve
- Cipó-uva
- Dorme-dorme
- Eucalipto
- Guariroba
- Imbaúba
- Mamoeiro-selvagem
- Margarida-do-campo
- Mata-pasto
- Myrcia
- Palmeira
- Pau-terra
- Sangra d' água

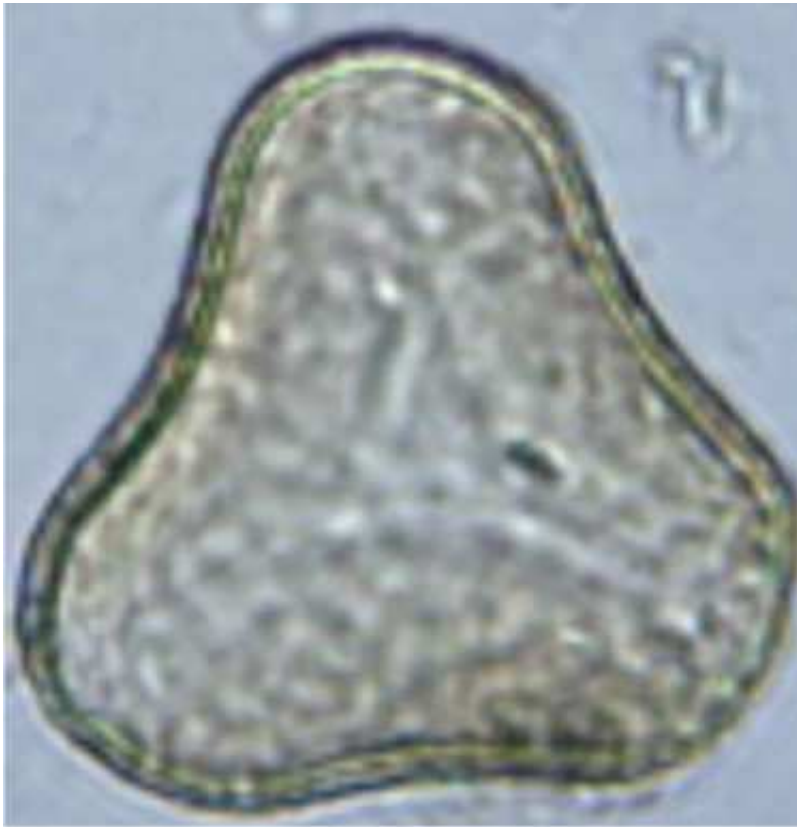

---

## 22

A que classe este pólen pertence?

- Alfazema-brava
- Almecega
- Angico
- Aroeira
- Arranha-gato
- Brachiaria
- Café-do-mato
- Camboatá
- Canela-de-ema
- Carvão-vermelho
- Cipó-neve
- Cipó-uva
- Dorme-dorme
- Eucalipto
- Guariroba
- Imbaúba
- Mamoeiro-selvagem
- Margarida-do-campo
- Mata-pasto
- Myrcia
- Palmeira
- Pau-terra
- Sangra d' água

---

**23**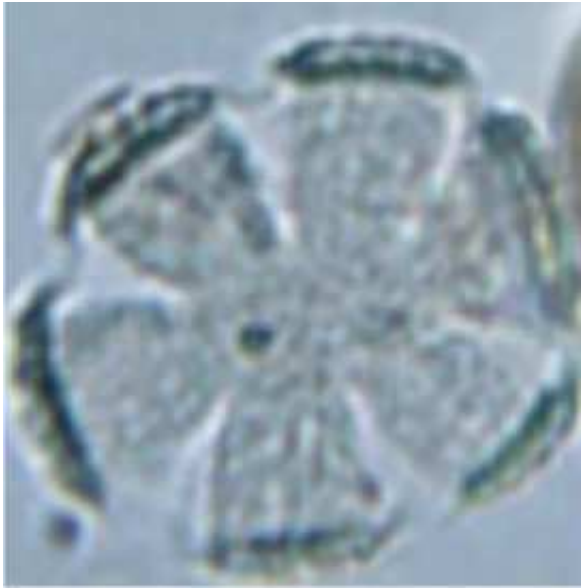

---

**23**

A que classe este pólen pertence?

- Alfazema-brava
- Almecega
- Angico
- Aroeira
- Arranha-gato
- Brachiaria
- Café-do-mato
- Camboatá
- Canela-de-ema
- Carvão-vermelho
- Cipó-neve
- Cipó-uva
- Dorme-dorme
- Eucalipto
- Guariroba
- Imbaúba
- Mamoeiro-selvagem
- Margarida-do-campo
- Mata-pasto
- Myrcia
- Palmeira
- Pau-terra
- Sangra d' água

---

**24**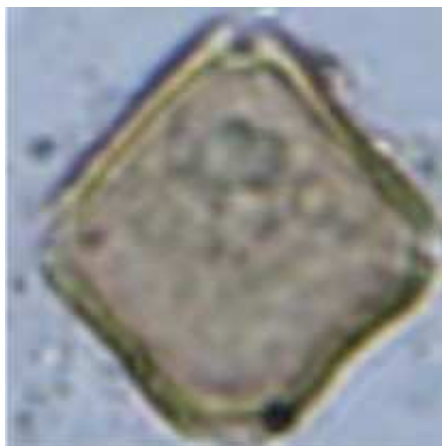

---

**24**

A que classe este pólen pertence?

- Alfazema-brava
- Almecega
- Angico
- Aroeira
- Arranha-gato
- Brachiaria
- Café-do-mato
- Camboatá
- Canela-de-ema
- Carvão-vermelho
- Cipó-neve
- Cipó-uva
- Dorme-dorme
- Eucalipto
- Guariroba
- Imbaúba
- Mamoeiro-selvagem
- Margarida-do-campo
- Mata-pasto
- Myrcia
- Palmeira
- Pau-terra
- Sangra d' água

---

**25**



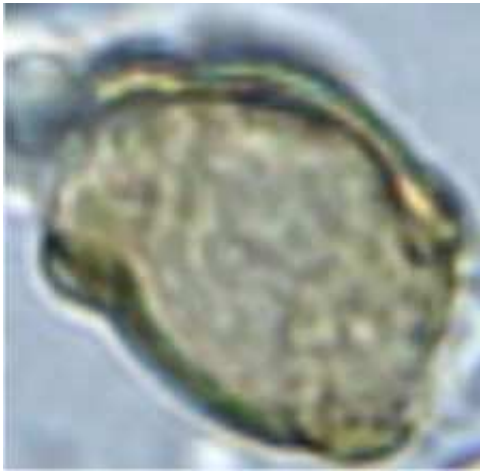

---

## 25

A que classe este pólen pertence?

- Alfazema-brava
- Almecega
- Angico
- Aroeira
- Arranha-gato
- Brachiaria
- Café-do-mato
- Camboatá
- Canela-de-ema
- Carvão-vermelho
- Cipó-neve
- Cipó-uva
- Dorme-dorme
- Eucalipto
- Guariroba
- Imbaúba
- Mamoeiro-selvagem
- Margarida-do-campo
- Mata-pasto
- Myrcia
- Palmeira
- Pau-terra
- Sangra d' água

---

## 26

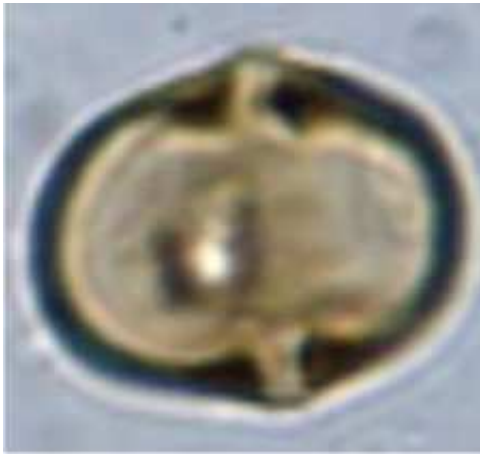

---

## 26

A que classe este pólen pertence?

- Alfazema-brava
- Almecega
- Angico
- Aroeira
- Arranha-gato
- Brachiaria
- Café-do-mato
- Camboatá
- Canela-de-ema
- Carvão-vermelho
- Cipó-neve
- Cipó-uva
- Dorme-dorme
- Eucalipto
- Guariroba
- Imbaúba
- Mamoeiro-selvagem
- Margarida-do-campo
- Mata-pasto
- Myrcia
- Palmeira
- Pau-terra
- Sangra d' água

---

## 27

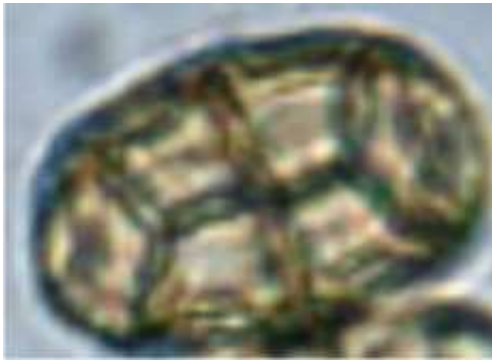

---

**27**

A que classe este pólen pertence?

- Alfazema-brava
- Almecega
- Angico
- Aroeira
- Arranha-gato
- Brachiaria
- Café-do-mato
- Camboatá
- Canela-de-ema
- Carvão-vermelho
- Cipó-neve
- Cipó-uva
- Dorme-dorme
- Eucalipto
- Guariroba
- Imbaúba
- Mamoeiro-selvagem
- Margarida-do-campo
- Mata-pasto
- Myrcia
- Palmeira
- Pau-terra
- Sangra d' água

---

**28**

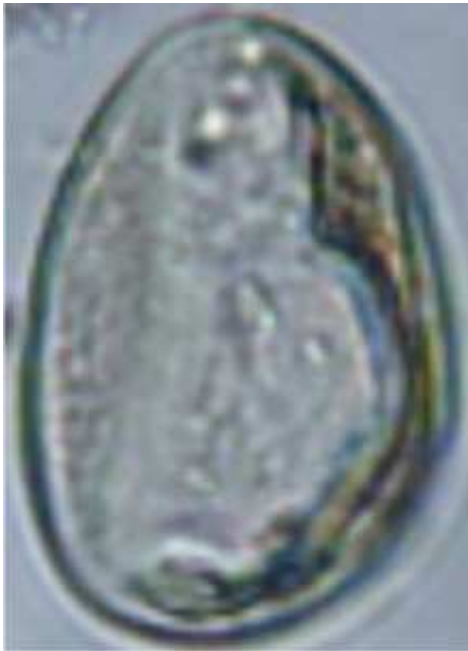

---

## 28

A que classe este pólen pertence?

- Alfazema-brava
- Almecega
- Angico
- Aroeira
- Arranha-gato
- Brachiaria
- Café-do-mato
- Camboatá
- Canela-de-ema
- Carvão-vermelho
- Cipó-neve
- Cipó-uva
- Dorme-dorme
- Eucalipto
- Guariroba
- Imbaúba
- Mamoeiro-selvagem
- Margarida-do-campo
- Mata-pasto
- Myrcia
- Palmeira
- Pau-terra
- Sangra d' água

---

## 29

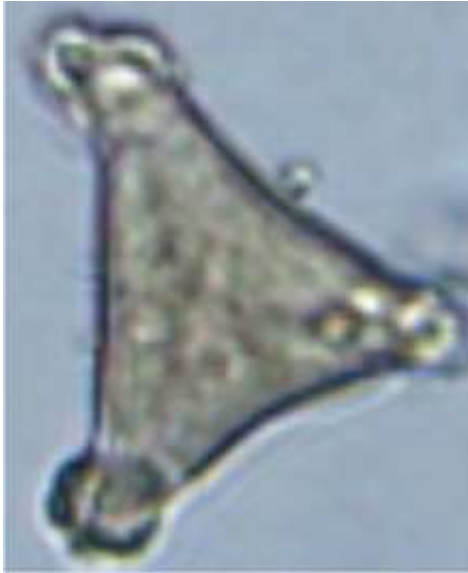

---

## 29

A que classe este pólen pertence?

- Alfazema-brava
- Almecega
- Angico
- Aroeira
- Arranha-gato
- Brachiaria
- Café-do-mato
- Camboatá
- Canela-de-ema
- Carvão-vermelho
- Cipó-neve
- Cipó-uva
- Dorme-dorme
- Eucalipto
- Guariroba
- Imbaúba
- Mamoeiro-selvagem
- Margarida-do-campo
- Mata-pasto
- Myrcia
- Palmeira
- Pau-terra
- Sangra d' água

---

## 30

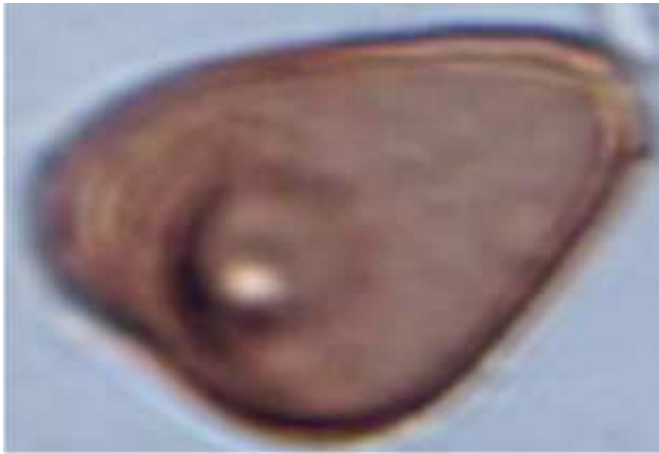

---

**30**

A que classe este pólen pertence?

- Alfazema-brava
- Almecega
- Angico
- Aroeira
- Arranha-gato
- Brachiaria
- Café-do-mato
- Camboatá
- Canela-de-ema
- Carvão-vermelho
- Cipó-neve
- Cipó-uva
- Dorme-dorme
- Eucalipto
- Guariroba
- Imbaúba
- Mamoeiro-selvagem
- Margarida-do-campo
- Mata-pasto
- Myrcia
- Palmeira
- Pau-terra
- Sangra d' água

---

**31**

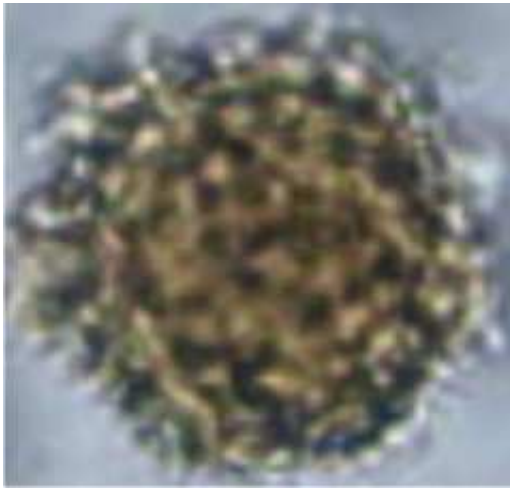

---

### 31

A que classe este pólen pertence?

- Alfazema-brava
- Almecega
- Angico
- Aroeira
- Arranha-gato
- Brachiaria
- Café-do-mato
- Camboatá
- Canela-de-ema
- Carvão-vermelho
- Cipó-neve
- Cipó-uva
- Dorme-dorme
- Eucalipto
- Guariroba
- Imbaúba
- Mamoeiro-selvagem
- Margarida-do-campo
- Mata-pasto
- Myrcia
- Palmeira
- Pau-terra
- Sangra d' água

---

### 32

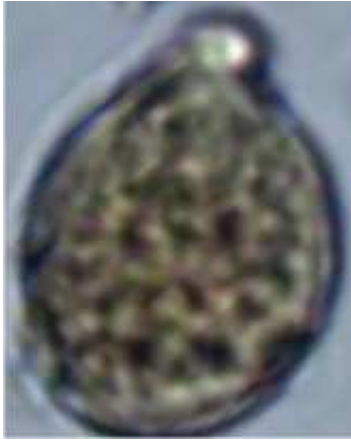

---

### 32

A que classe este pólen pertence?

- Alfazema-brava
- Almecega
- Angico
- Aroeira
- Arranha-gato
- Brachiaria
- Café-do-mato
- Camboatá
- Canela-de-ema
- Carvão-vermelho
- Cipó-neve
- Cipó-uva
- Dorme-dorme
- Eucalipto
- Guariroba
- Imbaúba
- Mamoeiro-selvagem
- Margarida-do-campo
- Mata-pasto
- Myrcia
- Palmeira
- Pau-terra
- Sangra d' água

---

### 33



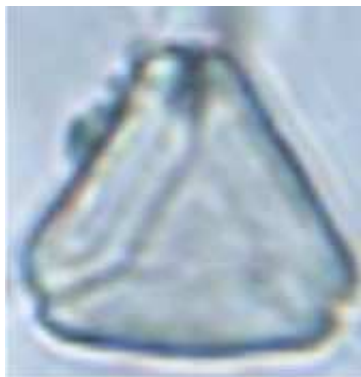

---

### 33

A que classe este pólen pertence?

- Alfazema-brava
- Almecega
- Angico
- Aroeira
- Arranha-gato
- Brachiaria
- Café-do-mato
- Camboatá
- Canela-de-ema
- Carvão-vermelho
- Cipó-neve
- Cipó-uva
- Dorme-dorme
- Eucalipto
- Guariroba
- Imbaúba
- Mamoeiro-selvagem
- Margarida-do-campo
- Mata-pasto
- Myrcia
- Palmeira
- Pau-terra
- Sangra d' água

---

### 34

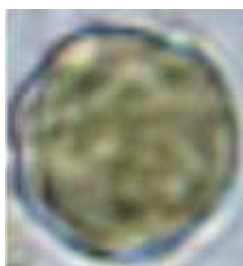

**34**

A que classe este pólen pertence?

- Alfazema-brava
- Almecega
- Angico
- Aroeira
- Arranha-gato
- Brachiaria
- Café-do-mato
- Camboatá
- Canela-de-ema
- Carvão-vermelho
- Cipó-neve
- Cipó-uva
- Dorme-dorme
- Eucalipto
- Guariroba
- Imbaúba
- Mamoeiro-selvagem
- Margarida-do-campo
- Mata-pasto
- Myrcia
- Palmeira
- Pau-terra
- Sangra d' água

**35**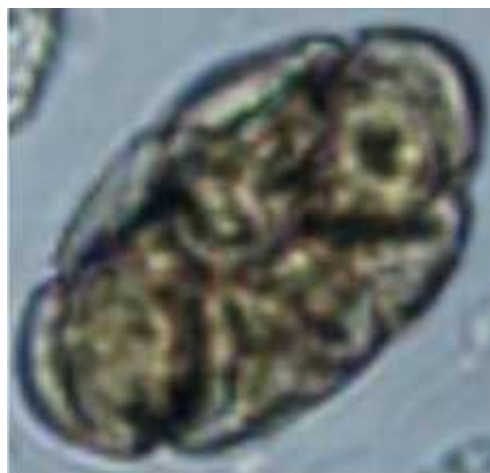**35**

A que classe este pólen pertence?

- Alfazema-brava
- Almecega

- Angico
- Aroeira
- Arranha-gato
- Brachiaria
- Café-do-mato
- Camboatá
- Canela-de-ema
- Carvão-vermelho
- Cipó-neve
- Cipó-uva
- Dorme-dorme
- Eucalipto
- Guariroba
- Imbaúba
- Mamoeiro-selvagem
- Margarida-do-campo
- Mata-pasto
- Myrcia
- Palmeira
- Pau-terra
- Sangra d' água

---

**36**

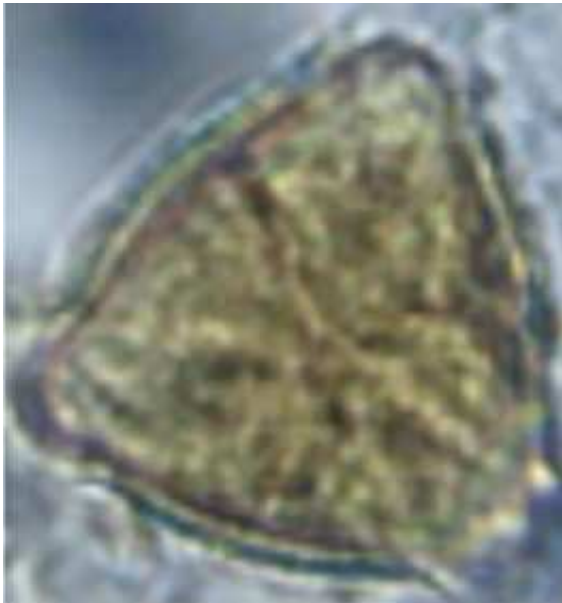

---

**36**

A que classe este pólen pertence?

- Alfazema-brava
- Almecega
- Angico

- Aroeira
  - Arranha-gato
  - Brachiaria
  - Café-do-mato
  - Camboatá
  - Canela-de-ema
  - Carvão-vermelho
  - Cipó-neve
  - Cipó-uva
  - Dorme-dorme
  - Eucalipto
  - Guariroba
  - Imbaúba
  - Mamoeiro-selvagem
  - Margarida-do-campo
  - Mata-pasto
  - Myrcia
  - Palmeira
  - Pau-terra
  - Sangra d' água
- 

37

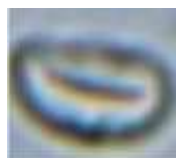

37

A que classe este pólen pertence?

- Alfazema-brava
- Almecega
- Angico
- Aroeira
- Arranha-gato
- Brachiaria
- Café-do-mato
- Camboatá
- Canela-de-ema
- Carvão-vermelho
- Cipó-neve
- Cipó-uva
- Dorme-dorme
- Eucalipto

- Guariroba
- Imbaúba
- Mamoeiro-selvagem
- Margarida-do-campo
- Mata-pasto
- Myrcia
- Palmeira
- Pau-terra
- Sangra d' água

---

38

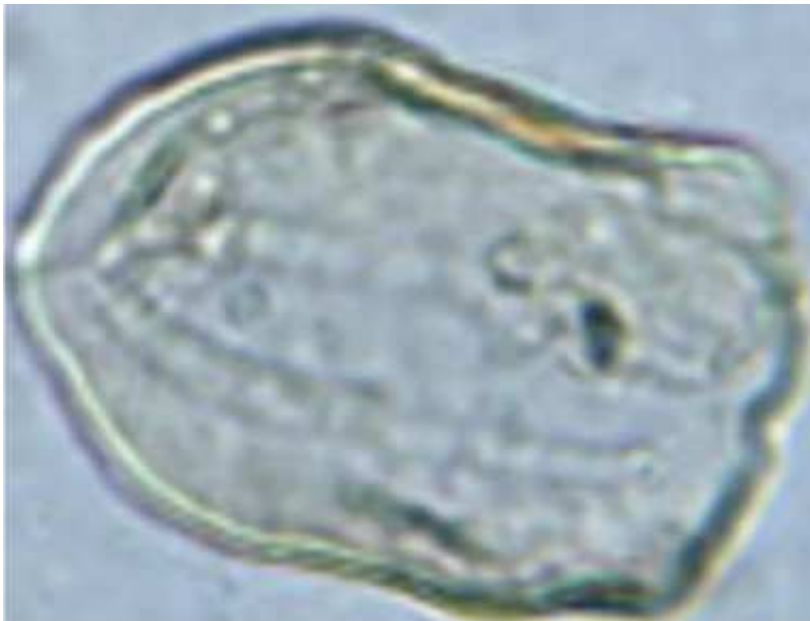

---

38

A que classe este pólen pertence?

- Alfazema-brava
- Almecega
- Angico
- Aroeira
- Arranha-gato
- Brachiaria
- Café-do-mato
- Camboatá
- Canela-de-ema
- Carvão-vermelho
- Cipó-neve
- Cipó-uva
- Dorme-dorme
- Eucalipto
- Guariroba

- Imbaúba
  - Mamoeiro-selvagem
  - Margarida-do-campo
  - Mata-pasto
  - Myrcia
  - Palmeira
  - Pau-terra
  - Sangra d' água
- 

39

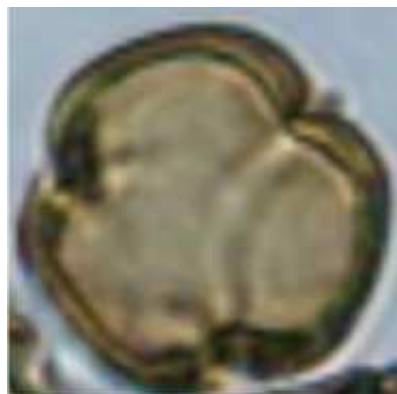

39

A que classe este pólen pertence?

- Alfazema-brava
- Almecega
- Angico
- Aroeira
- Arranha-gato
- Brachiaria
- Café-do-mato
- Camboatá
- Canela-de-ema
- Carvão-vermelho
- Cipó-neve
- Cipó-uva
- Dorme-dorme
- Eucalipto
- Guariroba
- Imbaúba
- Mamoeiro-selvagem
- Margarida-do-campo
- Mata-pasto
- Myrcia
- Palmeira

- Pau-terra
  - Sangra d' água
- 

40

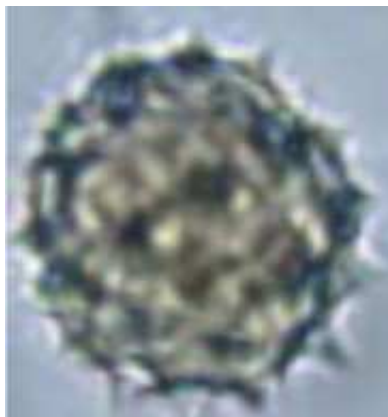

40

A que classe este pólen pertence?

- Alfazema-brava
  - Almecega
  - Angico
  - Aroeira
  - Arranha-gato
  - Brachiaria
  - Café-do-mato
  - Camboatá
  - Canela-de-ema
  - Carvão-vermelho
  - Cipó-neve
  - Cipó-uva
  - Dorme-dorme
  - Eucalipto
  - Guariroba
  - Imbaúba
  - Mamoeiro-selvagem
  - Margarida-do-campo
  - Mata-pasto
  - Myrcia
  - Palmeira
  - Pau-terra
  - Sangra d' água
- 

41

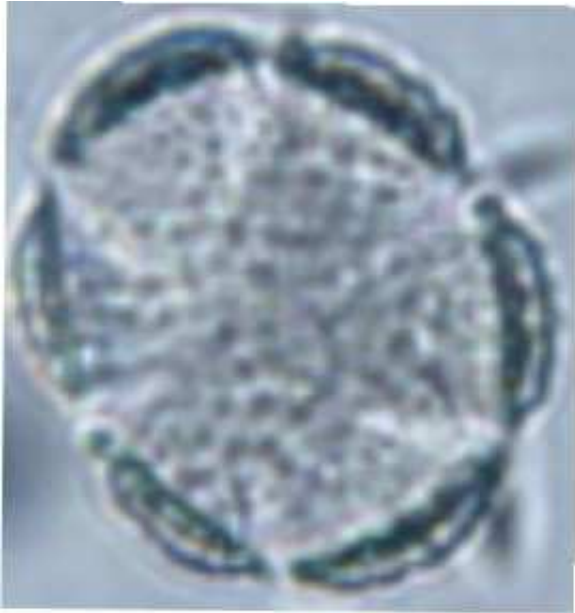

---

**41**

A que classe este pólen pertence?

- Alfazema-brava
- Almecega
- Angico
- Aroeira
- Arranha-gato
- Brachiaria
- Café-do-mato
- Camboatá
- Canela-de-ema
- Carvão-vermelho
- Cipó-neve
- Cipó-uva
- Dorme-dorme
- Eucalipto
- Guariroba
- Imbaúba
- Mamoeiro-selvagem
- Margarida-do-campo
- Mata-pasto
- Myrcia
- Palmeira
- Pau-terra
- Sangra d' água

---

**42**



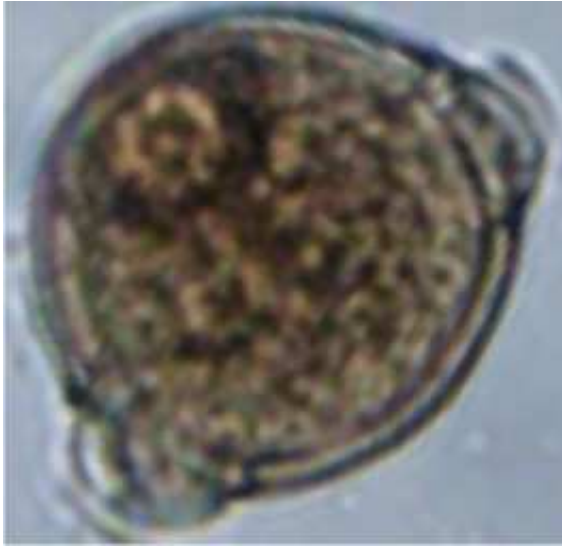

---

**42**

A que classe este pólen pertence?

- Alfazema-brava
- Almecega
- Angico
- Aroeira
- Arranha-gato
- Brachiaria
- Café-do-mato
- Camboatá
- Canela-de-ema
- Carvão-vermelho
- Cipó-neve
- Cipó-uva
- Dorme-dorme
- Eucalipto
- Guariroba
- Imbaúba
- Mamoeiro-selvagem
- Margarida-do-campo
- Mata-pasto
- Myrcia
- Palmeira
- Pau-terra
- Sangra d' água

---

**43**

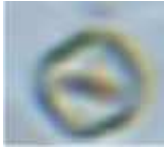

---

### 43

A que classe este pólen pertence?

- Alfazema-brava
- Almecega
- Angico
- Aroeira
- Arranha-gato
- Brachiaria
- Café-do-mato
- Camboatá
- Canela-de-ema
- Carvão-vermelho
- Cipó-neve
- Cipó-uva
- Dorme-dorme
- Eucalipto
- Guariroba
- Imbaúba
- Mamoeiro-selvagem
- Margarida-do-campo
- Mata-pasto
- Myrcia
- Palmeira
- Pau-terra
- Sangra d' água

---

### 44

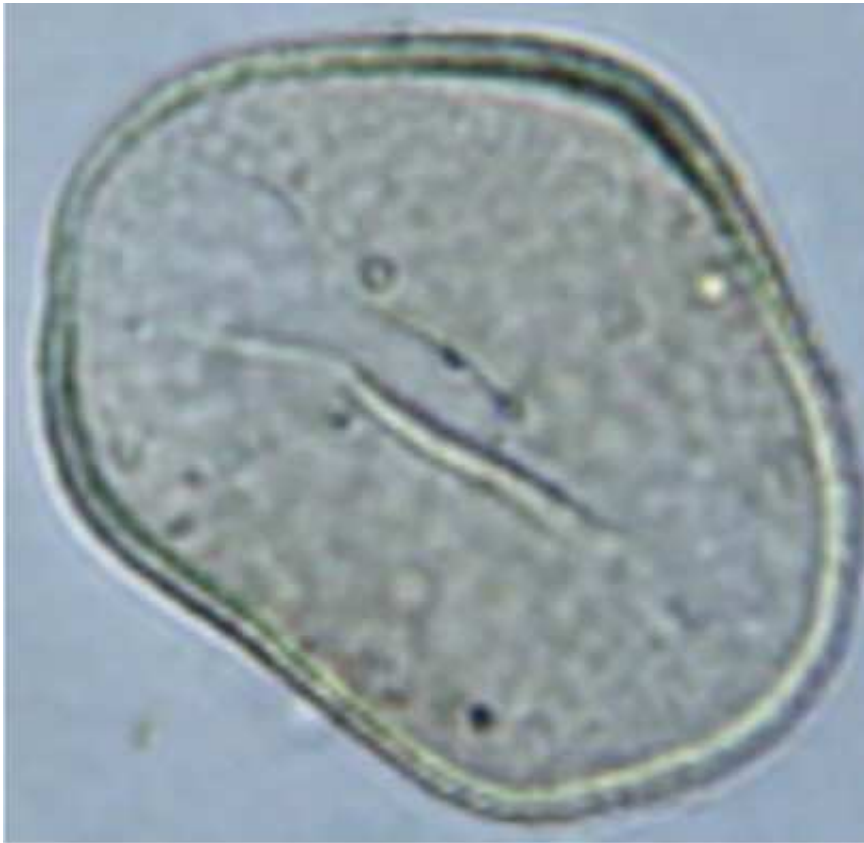

---

**44**

A que classe este pólen pertence?

- Alfazema-brava
- Almecega
- Angico
- Aroeira
- Arranha-gato
- Brachiaria
- Café-do-mato
- Camboatá
- Canela-de-ema
- Carvão-vermelho
- Cipó-neve
- Cipó-uva
- Dorme-dorme
- Eucalipto
- Guariroba
- Imbaúba
- Mamoeiro-selvagem
- Margarida-do-campo
- Mata-pasto
- Myrcia
- Palmeira
- Pau-terra

- Sangra d' água
- 

45

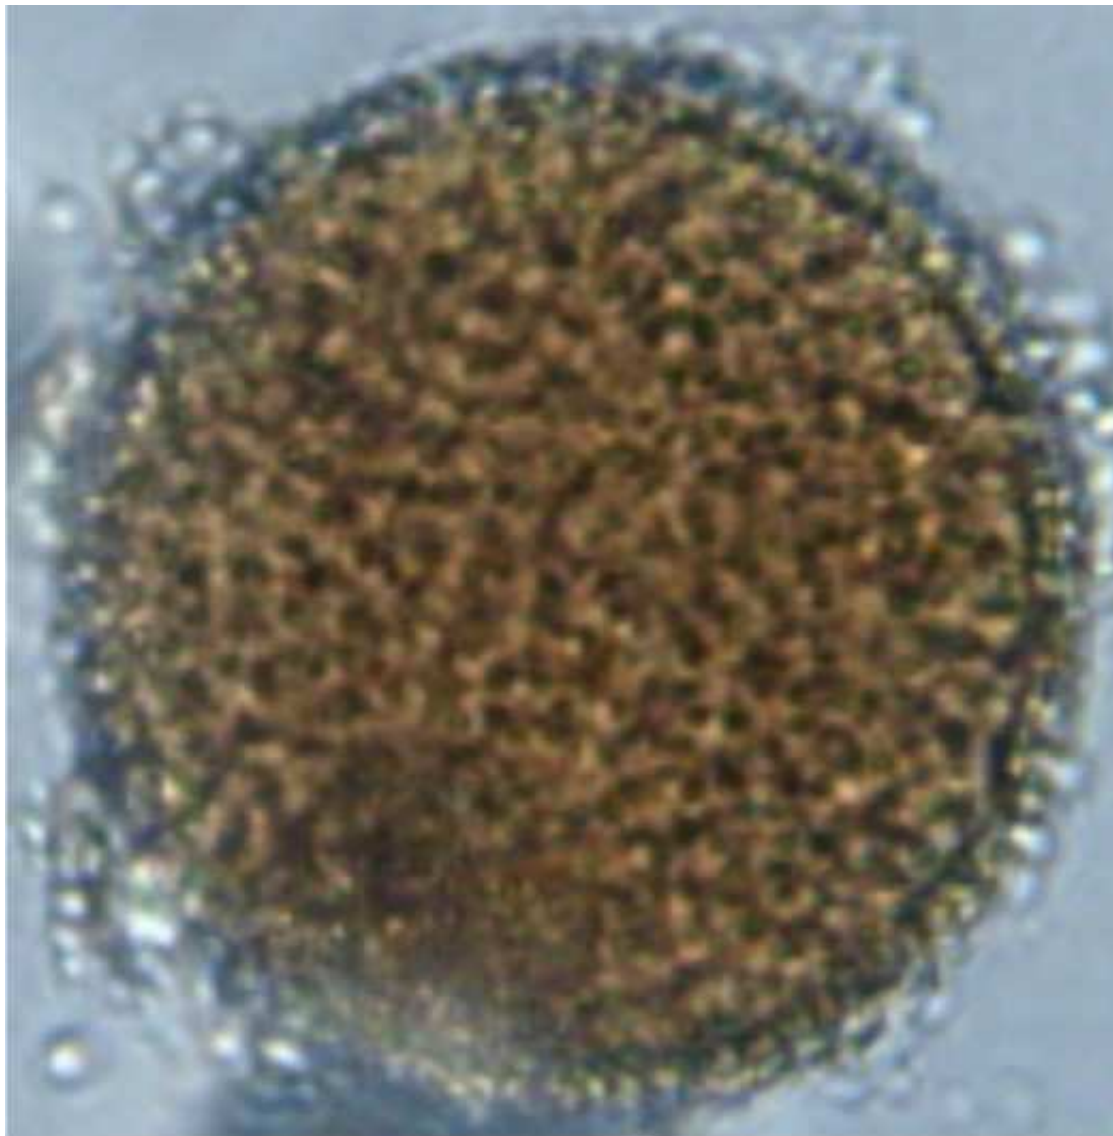

45

A que classe este pólen pertence?

- Alfazema-brava
- Almecega
- Angico
- Aroeira
- Arranha-gato
- Brachiaria
- Café-do-mato
- Camboatá
- Canela-de-ema
- Carvão-vermelho
- Cipó-neve
- Cipó-uva

- Dorme-dorme
  - Eucalipto
  - Guariroba
  - Imbaúba
  - Mamoeiro-selvagem
  - Margarida-do-campo
  - Mata-pasto
  - Myrcia
  - Palmeira
  - Pau-terra
  - Sangra d' água
- 

46

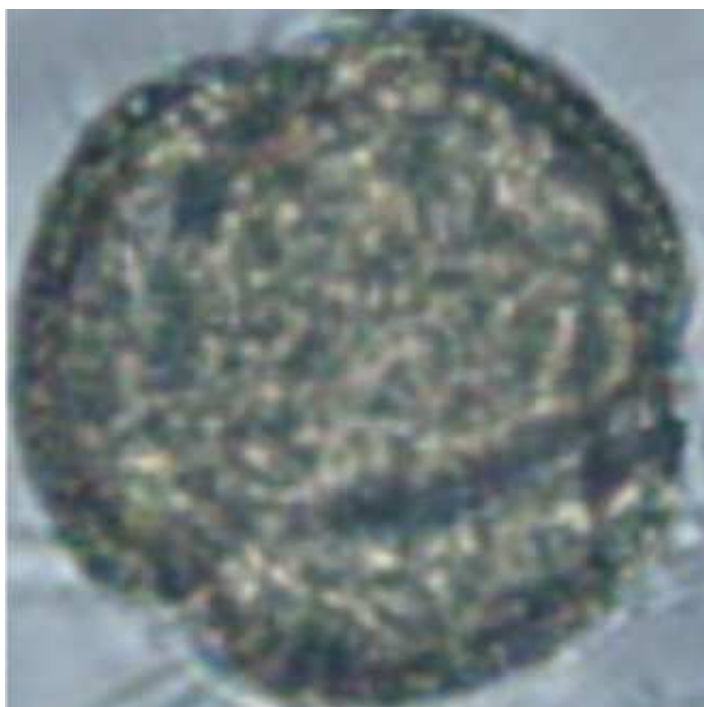

46

A que classe este pólen pertence?

- Alfazema-brava
- Almecega
- Angico
- Aroeira
- Arranha-gato
- Brachiaria
- Café-do-mato
- Camboatá
- Canela-de-ema
- Carvão-vermelho
- Cipó-neve

- Cipó-uva
- Dorme-dorme
- Eucalipto
- Guariroba
- Imbaúba
- Mamoeiro-selvagem
- Margarida-do-campo
- Mata-pasto
- Myrcia
- Palmeira
- Pau-terra
- Sangra d' água

---

**47**

Quais foram suas dificuldades na identificação dos polens?

---

**48**

Quais polens teve maior dificuldade para identificar e por quê?

---

**49**

O que observou na imagem para poder classificar o pólen?

Nunca envie senhas em Formulários Google.
